# Supplementary material for: Lyotropic liquid crystalline phases formed in ternary mixtures of N-alkyl-N-methylpyrrolidinium bromide/1-decanol/water
Source: Royal Society of Chemistry journal article supplement (doi:10.1039/c2ra21467a), 2012-01-01
Supplement: c2ra21467a.pdf [file c2ra21467a.pdf]

Supporting information for

## Lyotropic liquid crystalline phases formed in ternary mixtures of *N*-alkyl-*N*-methylpyrrolidinium bromide/1-decanol/water

Lijuan Shi<sup>1</sup>, Mingwei Zhao<sup>2</sup>, Liqiang Zheng<sup>1\*</sup>

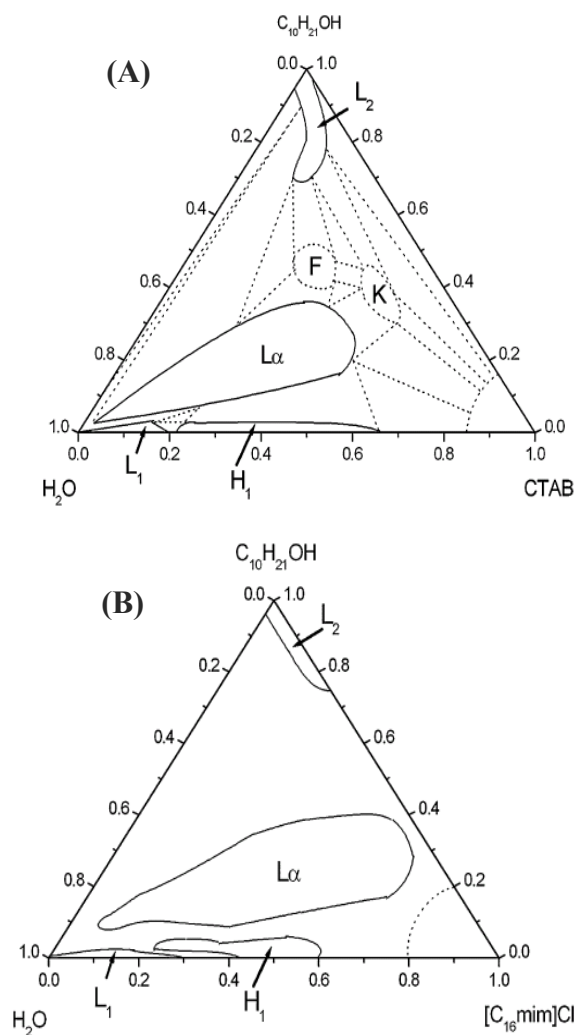

**Figure S1** (A) Phase diagram for the ternary system of C<sub>16</sub>TAB-C<sub>10</sub>H<sub>21</sub>OH-H<sub>2</sub>O [29]. Codes for phases: L<sub>1</sub>, isotropic H<sub>2</sub>O solution; L<sub>2</sub>, isotropic C<sub>10</sub>H<sub>21</sub>OH solution; H<sub>1</sub>, hexagonal; L<sub>α</sub>, lamellar; F, reversed hexagonal; K, reversed phase with a non-hexagonal rod-structure. (B) Phase diagram for the ternary system of [C<sub>16</sub>mim]Cl, C<sub>10</sub>H<sub>21</sub>OH, and H<sub>2</sub>O at 25°C [21]. Codes for phases: L<sub>1</sub>, isotropic H<sub>2</sub>O solution; L<sub>2</sub>, isotropic C<sub>10</sub>H<sub>21</sub>OH solution; H<sub>1</sub>, hexagonal; L<sub>α</sub>, lamellar.

Table S1 Structural parameters for the liquid crystalline phases in the  
 $C_n$ MPB– $C_{10}H_{21}OH$ – $H_2O$  ( $n = 12, 14, 16$ ) systems

| $C_n$ MPB | 12                |                 |                 |                      |              |                            | 14              |                 |                 |                      |              |                            | 16              |                 |                 |                      |              |                            |       |
|-----------|-------------------|-----------------|-----------------|----------------------|--------------|----------------------------|-----------------|-----------------|-----------------|----------------------|--------------|----------------------------|-----------------|-----------------|-----------------|----------------------|--------------|----------------------------|-------|
|           | $\Phi_s$<br>(%)   | $\Phi_o$<br>(%) | $\Phi_w$<br>(%) | $d_L(d_{II})$<br>(Å) | $d_w$<br>(Å) | $a_s$<br>(Å <sup>2</sup> ) | $\Phi_s$<br>(%) | $\Phi_o$<br>(%) | $\Phi_w$<br>(%) | $d_L(d_{II})$<br>(Å) | $d_w$<br>(Å) | $a_s$<br>(Å <sup>2</sup> ) | $\Phi_s$<br>(%) | $\Phi_o$<br>(%) | $\Phi_w$<br>(%) | $d_L(d_{II})$<br>(Å) | $d_w$<br>(Å) | $a_s$<br>(Å <sup>2</sup> ) |       |
| $L\alpha$ | L $\alpha$ -1     | 18.40           | 6.47            | 75.13                | 20.96        | 12.70                      | 19.95           | 17.89           | 7.11            | 75.00                | 24.50        | 12.63                      | 19.86           | 13.79           | 6.20            | 80.01                | 26.57        | 14.32                      | 20.66 |
|           | L $\alpha$ -2     | 14.82           | 5.19            | 79.99                | 20.46        | 14.09                      | 20.45           | 13.80           | 5.51            | 80.69                | 23.58        | 14.45                      | 20.57           | 11.76           | 5.10            | 83.13                | 26.20        | 15.64                      | 21.46 |
|           | L $\alpha$ -3     | 12.19           | 4.68            | 83.13                | 19.73        | 15.60                      | 21.14           | 12.27           | 5.21            | 82.52                | 22.90        | 15.56                      | 21.01           | 11.08           | 3.82            | 85.10                | 25.75        | 17.37                      | 22.18 |
| phase     | L $\alpha$ -4     | 11.16           | 3.73            | 85.11                | 19.23        | 16.96                      | 21.65           | 10.68           | 4.29            | 85.03                | 22.34        | 16.82                      | 21.63           | 8.09            | 3.58            | 88.33                | 24.85        | 19.80                      | 22.98 |
|           | H <sub>I</sub> -1 | 6.46            | 0.65            | 92.89                | 14.11        | 29.17                      | 28.17           | 6.44            | 0.67            | 92.89                | 16.46        | 31.83                      | 27.75           | 3.13            | 0.57            | 96.30                | 20.04        | 47.63                      | 26.37 |
|           | H <sub>I</sub> -2 | 7.82            | 0.60            | 91.58                | 14.53        | 28.34                      | 27.28           | 7.27            | 0.61            | 92.12                | 16.58        | 30.99                      | 27.83           | 4.62            | 0.61            | 94.77                | 19.04        | 39.13                      | 27.70 |
| phase     | H <sub>I</sub> -3 | 9.56            | 0.62            | 89.82                | 14.59        | 26.75                      | 27.16           | 8.80            | 0.62            | 90.58                | 16.86        | 29.73                      | 27.33           | 6.48            | 0.64            | 92.88                | 17.63        | 32.36                      | 29.63 |
|           | H <sub>I</sub> -4 | 11.78           | 0.57            | 87.63                | 14.75        | 25.31                      | 27.08           | 10.84           | 0.64            | 88.52                | 17.08        | 28.35                      | 26.97           | 8.24            | 0.23            | 91.19                | 16.07        | 24.51                      | 31.48 |

### Theory for calculation of structural parameters of liquid crystalline phase

The lattice parameters  $D$  (distance between the centers of adjacent cylinders), and  $d$  (lamellar periodicity) of the hexagonal and lamellar liquid crystalline phases were obtained according to eq. (1) and (2), respectively<sup>1</sup>.

$$q_{(h,k)} = (4\pi / \sqrt{3}D) \cdot (h^2 + k^2 - hk)^{1/2} \quad (1)$$

$$q_{(l)} = (2\pi / d) \cdot l \quad (2)$$

where  $q_{(h,k)}$  and  $q_{(l)}$  are the scattering vectors corresponding to the scattering peaks observed in the SAXS spectra for the hexagonal and lamellar phase, respectively,  $h$ ,  $k$ ,  $l$  are Miller indexes, and  $a_0$  is the lattice parameter.

From the results of SAXS, several structural parameters characterizing the structure of the liquid crystalline phase could be calculated as follows.

For hexagonal liquid crystalline, the radius of cylinder unit ( $d_H$ ) could be obtained using Eq. (3)<sup>2</sup>:

$$d_H = D \cdot \left( \frac{2}{\sqrt{3}\pi} \cdot (\phi_S + \phi_O) \right)^{1/2} \quad (3)$$

where  $\phi_S$  and  $\phi_O$  are the volume fractions of surfactant ( $C_n$ MPB) and oil (1-Decanol).

The volume fraction of surfactant  $\phi_S$  in the ternary mixture is calculated by Eq. (4)<sup>3</sup>:

$$\phi_S = \frac{W_S / \rho_S}{W_S / \rho_S + W_O / \rho_O + W_W / \rho_W} \quad (4)$$

where  $W_S$ ,  $W_O$ , and  $W_W$  are the weight fraction of  $C_n$ MPB, 1-decanol and water, respectively, and  $\rho_S$ ,  $\rho_O$ , and  $\rho_W$  are the densities of  $C_n$ MPB, 1-decanol and water, respectively. The density of  $C_n$ MPB is obtained using a pycnometer as reported previously<sup>4</sup>, and the reference solvent is ethyl acetate ( $\rho = 0.8944 \text{ g}\cdot\text{cm}^{-3}$ ). The densities of  $C_{12}$ MPB,  $C_{14}$ MPB, and  $C_{16}$ MPB are 1.1961, 1.1696, and 1.1538  $\text{g}\cdot\text{cm}^{-3}$ , respectively.

Furthermore, the thickness of water channel ( $d_W$ ) is given by

$$d_w = D - 2d_H \quad (5)$$

The area per molecule of  $C_n$ MPB at the hydrophilic/hydrophobic interface in the hexagonal phase could be given by

$$a_s = \frac{2V_L \cdot \phi_s + \phi_o}{d_H \phi_s} \quad (6)$$

where  $V_L$  is the volume of the hydrophobic part of the surfactant, calculated according to the Tanford equation<sup>5</sup>:

$$V_L (\text{\AA}^3) = 27.4 + 26.9N \quad (7)$$

$N$  denotes the number of carbon atoms of the hydrophobic chain of the surfactant.

For lamellar liquid crystalline phase, the thickness of hydrophobic domain ( $d_L$ ) could be obtained as

$$d_L = (\phi_s + \phi_o) \cdot d \quad (8)$$

While the thickness of the water layer ( $d_w$ ) is given by

$$d_w = d - d_L \quad (9)$$

Furthermore, the area per molecule for  $C_n$ MPB in the hydrophobic/hydrophilic interface is given by

$$a_s = \frac{2V_L \cdot \phi_s + \phi_o}{d_L \phi_s} \quad (10)$$

## References

- 1 F. Nilsson and O. Söderman, *Langmuir*, 1996, **12**, 902-908.
- 2 Y. Yamashita, H. Kunieda, E. Oshimura and K. Sakamoto, *J. Colloid Interface Sci.*, 2007, **312**, 172-178.
- 3 J. A. Riddick, W. B. Bunger and T. K. Sakano, in *Organic Solvents, Physical Properties and Methods of Purification*, Wiley-Interscience, New York, fourth edn., 1986, pp. 45.
- 4 W. W. Russell, *Ind. Eng. Chem. Anal. Ed.*, 1937, **9**, 592.
- 5 C. Tanford, *J. Phys. Chem.*, 1972, **76**, 3020-3024.
